# Supplementary material for: Who is at risk of occupational Q fever: new insights from a multi-profession cross-sectional study
Source: PubMed Central journal article supplement — BMJ Open. 2020 Feb 9;10(2):e030088. doi: 10.1136/bmjopen-2019-030088 (PMC7045227; doi:10.1136/bmjopen-2019-030088), 2020-02-09
Supplement: bmjopen-2019-030088.draft_revisions.pdf [file bmjopen-2019-030088.draft_revisions.pdf]

# BMJ Open

BMJ Open is committed to open peer review. As part of this commitment we make the peer review history of every article we publish publicly available.

When an article is published we post the peer reviewers' comments and the authors' responses online. We also post the versions of the paper that were used during peer review. These are the versions that the peer review comments apply to.

The versions of the paper that follow are the versions that were submitted during the peer review process. They are not the versions of record or the final published versions. They should not be cited or distributed as the published version of this manuscript.

BMJ Open is an open access journal and the full, final, typeset and author-corrected version of record of the manuscript is available on our site with no access controls, subscription charges or pay-per-view fees (<http://bmjopen.bmj.com>).

If you have any questions on BMJ Open's open peer review process please email [info.bmjopen@bmj.com](mailto:info.bmjopen@bmj.com)

# BMJ Open

## Who is at risk of occupational Q fever: new insights from a multiprofessional cross sectional study

|                               |                                                                                                                                                                                                                                                                                                                                                                                                                                   |
|-------------------------------|-----------------------------------------------------------------------------------------------------------------------------------------------------------------------------------------------------------------------------------------------------------------------------------------------------------------------------------------------------------------------------------------------------------------------------------|
| Journal:                      | <i>BMJ Open</i>                                                                                                                                                                                                                                                                                                                                                                                                                   |
| Manuscript ID                 | bmjopen-2019-030088                                                                                                                                                                                                                                                                                                                                                                                                               |
| Article Type:                 | Research                                                                                                                                                                                                                                                                                                                                                                                                                          |
| Date Submitted by the Author: | 26-Feb-2019                                                                                                                                                                                                                                                                                                                                                                                                                       |
| Complete List of Authors:     | Groten, Tanja; Universitätsklinikum Jena (University Hospital Jena), Department of Obstetrics<br>Kuenzer, Karola; Universitätsklinikum Jena (University Hospital Jena)<br>Moog, Udo; Thuringian Animal Health Service<br>Hermann, Beate; Praxis Dr. Thomas Seidel<br>Maier, Katrin; Universitätsklinikum Jena (University Hospital Jena)<br>Boden, Katharina; Dianovis GmbH; Universitätsklinikum Jena (University Hospital Jena) |
| Keywords:                     | shepherd, veterinarian, obstetrician, cattle farmer, <i>Coxiella burnetii</i>                                                                                                                                                                                                                                                                                                                                                     |
|                               |                                                                                                                                                                                                                                                                                                                                                                                                                                   |

SCHOLARONE™  
Manuscripts

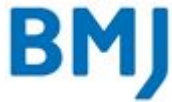

I, the Submitting Author has the right to grant and does grant on behalf of all authors of the Work (as defined in the below author licence), an exclusive licence and/or a non-exclusive licence for contributions from authors who are: i) UK Crown employees; ii) where BMJ has agreed a CC-BY licence shall apply, and/or iii) in accordance with the terms applicable for US Federal Government officers or employees acting as part of their official duties; on a worldwide, perpetual, irrevocable, royalty-free basis to BMJ Publishing Group Ltd ("BMJ") its licensees and where the relevant Journal is co-owned by BMJ to the co-owners of the Journal, to publish the Work in this journal and any other BMJ products and to exploit all rights, as set out in our [licence](#).

The Submitting Author accepts and understands that any supply made under these terms is made by BMJ to the Submitting Author unless you are acting as an employee on behalf of your employer or a postgraduate student of an affiliated institution which is paying any applicable article publishing charge ("APC") for Open Access articles. Where the Submitting Author wishes to make the Work available on an Open Access basis (and intends to pay the relevant APC), the terms of reuse of such Open Access shall be governed by a Creative Commons licence – details of these licences and which [Creative Commons](#) licence will apply to this Work are set out in our licence referred to above.

Other than as permitted in any relevant BMJ Author's Self Archiving Policies, I confirm this Work has not been accepted for publication elsewhere, is not being considered for publication elsewhere and does not duplicate material already published. I confirm all authors consent to publication of this Work and authorise the granting of this licence.

1  
2  
3  
4 Who is at risk of occupational Q fever: new insights from a multiprofessional cross sectional study  
5  
6

7 Tanja Groten<sup>1</sup>, Karola Kuenzer<sup>2</sup>, Udo Moog<sup>3</sup>, Beate Hermann<sup>4</sup>, Katrin Maier<sup>5</sup>, Katharina Boden<sup>6</sup>  
8  
9

10 Keywords: shepherd, veterinarian, obstetrician, cattle farmer, *Coxiella burnetii*  
11  
12  
13  
14  
15

16 Department of Obstetrics, University Hospital Jena<sup>1</sup>; Department of Child and Adolescent Psychiatry,  
17 Psychosomatic Medicine and Psychotherapy, University Hospital Jena<sup>2</sup>; Thuringian Animal Health  
18 Service, Jena, Germany<sup>3</sup>; Praxis Dr. Thomas Seidel, Weimar, Germany<sup>4</sup>; Institute of Transfusion  
19 Medicine, University Hospital Jena, Germany<sup>5</sup>, Institute of Medical Microbiology, University Hospital  
20 Jena and Dianovis GmbH Greiz, Germany<sup>6</sup>  
21  
22  
23  
24  
25  
26  
27  
28  
29

30 Author for correspondence (including correspondence and requests for reprints):  
31  
32

33 Katharina Boden, Dianovis GmbH Greiz, Wichmannstr. 12, 07973 Greiz, Germany (email:  
34

35 [katharina.boden@dianovis.de](mailto:katharina.boden@dianovis.de))  
36  
37

38 phone: 0049-3661-4644-33  
39

40 fax: 0049-3661-4644-22  
41  
42

43 running head: Q fever as occupational disease  
44  
45  
46

47 word count: 1320  
48  
49  
50  
51  
52  
53  
54  
55  
56  
57  
58  
59  
60

## ABSTRACT

**Objectives:** Q fever is caused by the bacterium *Coxiella burnetii*. The disease has re-emerged as a significant public health issue as has been demonstrated by several outbreaks. Most of the outbreaks involved sheep and goats where *C. burnetii* can be found in high numbers in the amniotic fluid, placenta and foetal membranes of infected animals. The extracellular form of the bacterium is highly resistant to environmental stresses and human infection typically occurs by inhalation of contaminated dust or aerosols. Q fever is recognized as an occupational hazard for individuals who are in regular close contact with animal birth products. Obstetricians are sometimes infected from human birth products. Tight hygiene regulations are therefore applied during the delivery of women with known Q fever. Despite this knowledge there are no systematic investigations of Q fever prevalence in occupational risk groups.

**Design:** We carried out a cross-sectional study.

**Setting:** The study included shepherds, cattle farmers, veterinarians and obstetricians from Thuringia.

**Participants:** 77 shepherds, 74 veterinarians, 14 cattle farmer, 17 office employees and 68 obstetricians participated. The control group consisted of 92 blood donors.

**Primary outcome measure:** The primary outcome measure was *Coxiella burnetii* phase II specific IgG. The used assay was evaluated for this purpose in a previous study.

**Results:** We analysed 250 blood samples revealing the highest seroprevalences in individuals with frequent animal contact (64-77%). There were no significant differences between cattle farmers, veterinarians and shepherds. The seroprevalence in people working in administration was lower but still significantly greater than the control. No obstetricians or midwives tested positive.

**Conclusions:** Shepherds, veterinarians and cattle farmers have a high risk of *C. burnetii* infection. However, our study clearly proves that there was no increased risk for people working in an obstetric department.

### Strengths and limitations of this study

- Undertook a cross sectional study using a serological test with proven excellent performance for this purpose
- Investigation of different professional groups with reliable sample sizes.
- First investigation of people working in an obstetrical department.
- The study was limited to a single centre.
- Random sampling may lead to a bias toward an increased Q fever seroprevalence.

## INTRODUCTION

Q fever is caused by the bacterium *Coxiella burnetii*. The disease has re-emerged as a significant public health issue as has been demonstrated by several outbreaks. These outbreaks have affected up to 4000 people. The symptoms of human Q fever are non-specific and the acute disease presents as febrile illness, a flu-like syndrome or pneumonia. But the acute disease may pass by asymptotically. Both symptomatic and asymptomatic infections can become chronic, causing endocarditis or vasculitis associated with a high mortality rate (1). Most outbreaks are associated with sheep and goats where *C. burnetii* can be found in high numbers in the amniotic fluid, placenta and foetal membranes of infected animals (2). The extracellular survival form of the bacterium (small cell variant) is highly resistant to environmental stresses such as desiccation (3). This means it can persist in the environment for weeks. Human infection then typically occurs by inhalation of contaminated dust or aerosols. Infection with *C. burnetii* is an occupational hazard for those who are regularly in close contact with animal birth products. Such groups include farmers, veterinarians, and workers in zoos or abattoirs (4).

*Coxiella burnetii* can also be found in the birth products of women with Q fever during pregnancy and can cause perinatal infections of obstetricians (5). In consequence, strict hygiene rules and regulations are applied in Germany during delivery by women infected with *C. burnetii*.

We investigated the question, who is at risk of occupational Q fever, determining the seroprevalence of *C. burnetii* antibodies in people of different occupational groups. We performed the study with an assay validated for seroprevalence testing.

## METHODS

1  
2  
3 We conducted a cross-sectional study between 2009 and 2016 that included several at risk  
4 groups. We recruited shepherds at several educational meetings of the occupational union for  
5 shepherds between 2009 and 2010, cattle farmers at a congress for cattle farmers in 2010, and  
6 veterinaries at a number of educational meetings on veterinary medicine and animal health in  
7 2016. To recruit participants working in an obstetrical department, we attended educational  
8 meetings of the occupational union of midwives and offered *C. burnetii* –specific antibody  
9 testing for all staff members of the Department of Obstetrics and Gynecology, University  
10 Hospital Jena between January and August 2016. Information about occupational history and  
11 contact with sheep, goats and cattle was collected by interview. A blood sample was taken  
12 from every interviewee and the sera were stored at -80°C until antibody testing. Sera of 92  
13 blood donors were tested as a control-group. The study was approved by the Ethical  
14 committee of the University Hospital Jena (reference number 2525-04/09, 4615-11/15).  
15 Patients or the public were not involved in the conceptualization or carrying out of this  
16 research.

17  
18 We analysed the sera for *C. burnetii*-Phase II-specific IgG antibodies with the Panbio-ELISA.  
19 The Panbio-ELISA assay was conducted manually according to the manufacturer's  
20 instructions. Optical densities were read at 450nm with a reference wave length of 620nm  
21 (Sunrise, Tecan).

22  
23 Calculation was performed using the Statistical Package for Social Sciences (SPSS version  
24 21, Chicago, IL, USA). The seroprevalences of the different groups were compared using the  
25 chi-squared test.

## 26 RESULTS



A total of 250 people participated in our study (table 1). The sex ratio of the different occupational groups ranged from 99% females in the obstetrician group to 90% males in the shepherd group.

The highest seroprevalences were found for people with frequent animal contact (64-77%).

There were no significant differences between cattle farmers, veterinarians and shepherds.

The seroprevalence of people working in administration was lower than in those with animal contact but still significant greater than the control group. None of the obstetrician group was positive for past Q fever infection.

Table 1. Prevalence of *Coxiella burnetii*-Phase II-specific IgG in different occupational settings

| Group            | n  | female:male | age (range)<br>[years] | prevalence*<br>[%] | p-value   |
|------------------|----|-------------|------------------------|--------------------|-----------|
| Blood donors     | 92 | 3:1         | 35 (18-67)             | 2.2                | reference |
| Shepherds        | 77 | 1:9         | 45 (19-70)             | 76.6               | < 0.001   |
| Cattle farmers   | 14 | 1:2         | 52 (32-65)             | 70.3               | < 0.001   |
| Veterinarians    | 74 | 1:1         | 45 (24-75)             | 64.3               | < 0.001   |
| Office employees | 17 | 3:1         | 46 (26-56)             | 41.2               | < 0.001   |
| Obstetricians    | 68 | 99:1        | 44 (24-64)             | 0.0                | 0.221     |

\*seroprevalence for *C. burnetii*-Phase II-specific IgG

## DISCUSSION

This is the first study investigating different occupational groups for past Q fever using an assay validated for seroprevalence studies. But, as we have already shown previously, it is essential to choose the appropriate test (6). Our evaluation of three different commercially

1  
2  
3 available ELISA for detection of past *C. burnetii*- infection revealed sensitivities of 42, 51 and  
4  
5 100% with specificity ranging from 94 to 100% (6). Based on our evaluation data we chose  
6  
7 the Panbio-ELISA (sensitivity 100%; specificity 94%) for our study.  
8  
9

10 Cohort composition was based on random sampling performed in different occupational  
11  
12 groups and settings. A potential bias cannot be ruled out as people with Q fever contact in the  
13  
14 past may have an increased interest in being tested. However, this bias should be comparable  
15  
16 in all cohorts investigated.  
17  
18

19  
20 We found a very high seroprevalence, 70%, in people with close occupational contact with  
21  
22 animals. The seroprevalence was even raised, 41%, for people working in the administration  
23  
24 despite their only having sporadic contact with animals. These remarkably high  
25  
26 seroprevalences are reliable considering the enormous number of *C. burnetii* in some  
27  
28 placentae ( $10^9$ /g) or milk ( $10^5$ /ml) (2) together with the high infectivity of the bacterium (it  
29  
30 has been estimated that a single organism can cause disease), the enhanced resistance to  
31  
32 environmental stresses (it survives on wool for 7-10 months (3)) and a flock level prevalence  
33  
34 of 28% (7).  
35  
36  
37  
38  
39

40 Seroprevalences in shepherds generally range from 29 to 59% (8, 9) and in veterinarians  
41  
42 from 10 to 75% (10, 11). However, these data are not strictly comparable because they result  
43  
44 from very different assays, in-house tests and even from tests using different cut off values.  
45  
46 The only other study using Panbio-ELISA (12) revealed similar results to those in our study  
47  
48 with 78% for veterinarians and 54% for cattle farmer in Sicily.  
49  
50  
51

52 Keeping in mind that more outbreaks are related to sheep than to cattle, it is interesting that  
53  
54 there was no difference between people handling sheep and those handling cattle. This  
55  
56 indicates that people working with cattle are exposed to *C. burnetii* to a similar degree as  
57  
58 those working with sheep. It also indicates that *C. burnetii* strains from cattle are as infective  
59  
60

1  
2  
3 for humans as those in sheep. Thus, it is likely that differences in animal husbandry are  
4 responsible for the higher number of outbreaks associated with sheep than with cattle.  
5

6  
7 There is, as yet, little data on Q fever as an occupational risk for obstetricians. The only  
8 prevalence study available is from the 1970s in Bulgaria. It used a complement fixation test  
9 and revealed 37% positivity for obstetricians compared to 8% positivity in blood donors (13).  
10  
11

12  
13 The value for obstetricians in this study is much higher than what we found. This discrepancy  
14 probably arises from the high hygiene standards of modern obstetrics. The development of the  
15 infective and highly resistant form of *C. burnetii* (small cell variant) is promoted by  
16 desiccation. But obstetrical departments are frequently cleaned and disinfected and waste is  
17 rapidly disposed of so reducing the risk of the small cell variant spreading.  
18  
19

20  
21 Based on the tropism of the bacteria for trophoblasts and a case report of the perinatal  
22 infection of an obstetrician with pneumonia (5) a strict hygiene scenario was recommended in  
23 Germany for the delivery of women infected with *C. burnetii*. We hope that our data leads to  
24 a reevaluation of the necessity of such strict and inconvenient protecting procedures during  
25 delivery.  
26  
27

28  
29 In conclusion, shepherds, veterinarians and cattle farmers and even people with sporadic  
30 animal contact like employees in veterinary offices have a high risk of *C. burnetii* infection.  
31 Physicians should therefore consider *C. burnetii* infection as a differential diagnosis for acute  
32 febrile illness as well as for endocarditis and vasculitis in these occupational groups. In  
33 contrast, our study clearly proves that there is no increased risk for people working in an  
34 obstetric department. The already high hygienic standards in obstetrical departments are  
35 sufficient to keep under control the occupational risk for Q fever.  
36  
37

38  
39 **Contributor ship statement** TG and KB conceived the study. TG, KK, UM, KB designed  
40 the study. KK, UM, BH performed the experiments. TG, KK, KB analyzed the data. UM, KM  
41 provided resources. TG, KK, BH and KB wrote the manuscript. A previous version of the  
42  
43  
44  
45  
46  
47  
48  
49  
50  
51  
52  
53  
54  
55  
56  
57  
58  
59  
60

manuscript was edited for English by Dr A. J. Davis (English Experience Language Services, Jena, Germany).

**Funding** This work was supported by the Federal Ministry of Education and Research Germany (KB Grant 01 KI 0735, 01 KI 1001C).

**Data sharing statement** Extra data is available by emailing [katharina.boden@dianovis.de](mailto:katharina.boden@dianovis.de)

1. Broos PP, Hagens JC, Kampschreur LM et al. Vascular complications and surgical interventions after world's largest Q fever outbreak. *J Vasc Surg.* 2015;62(5):1273-80.
2. Bell EJ, Parker RR, Stoenner HG. Experimental Q fever in cattle. *Am J Public Health Nations Health.* 1949;39(4):478-84.
3. Christie AB. Q fever. In: Christie AB, editor. *Infectious Diseases: Epidemiology and Clinical Practice.* New York: Churchill Livingstone; 1980. p. 800.
4. Garner MG, Longbottom HM, Cannon RM et al. A review of Q fever in Australia 1991-1994. *Australian and New Zealand journal of public health.* 1997;21(7):722-30.
5. Stein A, Raoult D. Q fever during pregnancy: a public health problem in southern France. *Clin Infect Dis.* 1998;27(3):592-6.
6. Frosinski J, Hermann B, Maier K et al. Enzyme-linked immunosorbent assays in seroprevalence studies of Q fever: the need for cut-off adaptation and the consequences for prevalence data. *Epidemiol Infect.* 2016;144(6):1148-52.
7. Hilbert A, Schmoock G, Lenzko H et al. Prevalence of *Coxiella burnetii* in clinically healthy German sheep flocks. *BMC Res Notes.* 2012;5:152.
8. Dolce P, Belanger MJ, Tumanowicz K et al. *Coxiella burnetii* seroprevalence of shepherds and their flocks in the lower Saint-Lawrence River region of Quebec, Canada. *Can J Infect Dis.* 2003;14(2):97-102.
9. de Lange MM, Schimmer B, Vellema P et al. *Coxiella burnetii* seroprevalence and risk factors in sheep farmers and farm residents in The Netherlands. *Epidemiol Infect.* 2014;142(6):1231-44.
10. Thibon M, Villiers V, Souque P et al. High incidence of *Coxiella burnetii* markers in a rural population in France. *Eur J Epidemiol.* 1996;12(5):509-13.
11. Nowotny N, Deutz A, Fuchs K et al. Prevalence of swine influenza and other viral, bacterial, and parasitic zoonoses in veterinarians. *J Infect Dis.* 1997;176(5):1414-5.
12. Fenga C, Gangemi S, De Luca A et al. Seroprevalence and occupational risk survey for *Coxiella burnetii* among exposed workers in Sicily, Southern Italy. *Int J Occup Med Environ Health.* 2015;28(5):901-7.
13. Ganchev N, Serbezov V, Alexandrov E. Incidence of Q fever in two inadequately investigated occupational groups. *J Hyg Epidemiol Microbiol Immunol.* 1977;21(4):405-11.

**STROBE 2007 (v4) Statement—Checklist of items that should be included in reports of *cross-sectional studies***

| Section/Topic                | Item # | Recommendation                                                                                                                                                                       | Reported on page # |
|------------------------------|--------|--------------------------------------------------------------------------------------------------------------------------------------------------------------------------------------|--------------------|
| <b>Title and abstract</b>    | 1      | (a) Indicate the study's design with a commonly used term in the title or the abstract                                                                                               | 1                  |
|                              |        | (b) Provide in the abstract an informative and balanced summary of what was done and what was found                                                                                  | 2                  |
| <b>Introduction</b>          |        |                                                                                                                                                                                      |                    |
| Background/rationale         | 2      | Explain the scientific background and rationale for the investigation being reported                                                                                                 | 4                  |
| Objectives                   | 3      | State specific objectives, including any prespecified hypotheses                                                                                                                     | 4                  |
| <b>Methods</b>               |        |                                                                                                                                                                                      |                    |
| Study design                 | 4      | Present key elements of study design early in the paper                                                                                                                              | 5                  |
| Setting                      | 5      | Describe the setting, locations, and relevant dates, including periods of recruitment, exposure, follow-up, and data collection                                                      | 5                  |
| Participants                 | 6      | (a) Give the eligibility criteria, and the sources and methods of selection of participants                                                                                          | 5                  |
| Variables                    | 7      | Clearly define all outcomes, exposures, predictors, potential confounders, and effect modifiers. Give diagnostic criteria, if applicable                                             | 5                  |
| Data sources/<br>measurement | 8*     | For each variable of interest, give sources of data and details of methods of assessment (measurement). Describe comparability of assessment methods if there is more than one group | 5                  |
| Bias                         | 9      | Describe any efforts to address potential sources of bias                                                                                                                            | 7                  |
| Study size                   | 10     | Explain how the study size was arrived at                                                                                                                                            | 5                  |
| Quantitative variables       | 11     | Explain how quantitative variables were handled in the analyses. If applicable, describe which groupings were chosen and why                                                         | 5                  |
| Statistical methods          | 12     | (a) Describe all statistical methods, including those used to control for confounding                                                                                                | 5                  |
|                              |        | (b) Describe any methods used to examine subgroups and interactions                                                                                                                  | 5                  |
|                              |        | (c) Explain how missing data were addressed                                                                                                                                          | No missing data    |
|                              |        | (d) If applicable, describe analytical methods taking account of sampling strategy                                                                                                   |                    |
|                              |        | (e) Describe any sensitivity analyses                                                                                                                                                | 6                  |
| <b>Results</b>               |        |                                                                                                                                                                                      |                    |

|                          |     |                                                                                                                                                                                                              |                 |
|--------------------------|-----|--------------------------------------------------------------------------------------------------------------------------------------------------------------------------------------------------------------|-----------------|
| Participants             | 13* | (a) Report numbers of individuals at each stage of study—eg numbers potentially eligible, examined for eligibility, confirmed eligible, included in the study, completing follow-up, and analysed            | 6               |
|                          |     | (b) Give reasons for non-participation at each stage                                                                                                                                                         | 7               |
|                          |     | (c) Consider use of a flow diagram                                                                                                                                                                           |                 |
| Descriptive data         | 14* | (a) Give characteristics of study participants (eg demographic, clinical, social) and information on exposures and potential confounders                                                                     | 6               |
|                          |     | (b) Indicate number of participants with missing data for each variable of interest                                                                                                                          | No missing data |
| Outcome data             | 15* | Report numbers of outcome events or summary measures                                                                                                                                                         | 6               |
| Main results             | 16  | (a) Give unadjusted estimates and, if applicable, confounder-adjusted estimates and their precision (eg, 95% confidence interval). Make clear which confounders were adjusted for and why they were included |                 |
|                          |     | (b) Report category boundaries when continuous variables were categorized                                                                                                                                    |                 |
|                          |     | (c) If relevant, consider translating estimates of relative risk into absolute risk for a meaningful time period                                                                                             |                 |
| Other analyses           | 17  | Report other analyses done—eg analyses of subgroups and interactions, and sensitivity analyses                                                                                                               |                 |
| <b>Discussion</b>        |     |                                                                                                                                                                                                              |                 |
| Key results              | 18  | Summarise key results with reference to study objectives                                                                                                                                                     | 7               |
| Limitations              | 19  | Discuss limitations of the study, taking into account sources of potential bias or imprecision. Discuss both direction and magnitude of any potential bias                                                   | 7               |
| Interpretation           | 20  | Give a cautious overall interpretation of results considering objectives, limitations, multiplicity of analyses, results from similar studies, and other relevant evidence                                   | 8               |
| Generalisability         | 21  | Discuss the generalisability (external validity) of the study results                                                                                                                                        | 8               |
| <b>Other information</b> |     |                                                                                                                                                                                                              |                 |
| Funding                  | 22  | Give the source of funding and the role of the funders for the present study and, if applicable, for the original study on which the present article is based                                                | 9               |

\*Give information separately for cases and controls in case-control studies and, if applicable, for exposed and unexposed groups in cohort and cross-sectional studies.

**Note:** An Explanation and Elaboration article discusses each checklist item and gives methodological background and published examples of transparent reporting. The STROBE checklist is best used in conjunction with this article (freely available on the Web sites of PLoS Medicine at <http://www.plosmedicine.org/>, Annals of Internal Medicine at <http://www.annals.org/>, and Epidemiology at <http://www.epidem.com/>). Information on the STROBE Initiative is available at [www.strobe-statement.org](http://www.strobe-statement.org).

# BMJ Open

## Who is at risk of occupational Q fever: new insights from a multi profession cross sectional study

|                                 |                                                                                                                                                                                                                                                                                                                                                                                                                                             |
|---------------------------------|---------------------------------------------------------------------------------------------------------------------------------------------------------------------------------------------------------------------------------------------------------------------------------------------------------------------------------------------------------------------------------------------------------------------------------------------|
| Journal:                        | <i>BMJ Open</i>                                                                                                                                                                                                                                                                                                                                                                                                                             |
| Manuscript ID                   | bmjopen-2019-030088.R1                                                                                                                                                                                                                                                                                                                                                                                                                      |
| Article Type:                   | Original research                                                                                                                                                                                                                                                                                                                                                                                                                           |
| Date Submitted by the Author:   | 12-Jun-2019                                                                                                                                                                                                                                                                                                                                                                                                                                 |
| Complete List of Authors:       | Groten, Tanja; Universitätsklinikum Jena (University Hospital Jena), Department of Obstetrics<br>Kuenzer, Karola; Universitätsklinikum Jena (University Hospital Jena)<br>Moog, Udo; Thuringian Animal Health Service<br>Hermann, Beate; Medical Practice Dr. Thomas Seidel<br>Maier, Katrin; Universitätsklinikum Jena (University Hospital Jena)<br>Boden, Katharina; Dianovis GmbH; Universitätsklinikum Jena (University Hospital Jena) |
| <b>Primary Subject Heading</b>: | Infectious diseases                                                                                                                                                                                                                                                                                                                                                                                                                         |
| Secondary Subject Heading:      | Epidemiology, Obstetrics and gynaecology, Occupational and environmental medicine, Public health                                                                                                                                                                                                                                                                                                                                            |
| Keywords:                       | shepherd, veterinarian, obstetrician, cattle farmer, <i>Coxiella burnetii</i>                                                                                                                                                                                                                                                                                                                                                               |
|                                 |                                                                                                                                                                                                                                                                                                                                                                                                                                             |

SCHOLARONE™  
Manuscripts

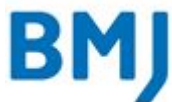

I, the Submitting Author has the right to grant and does grant on behalf of all authors of the Work (as defined in the below author licence), an exclusive licence and/or a non-exclusive licence for contributions from authors who are: i) UK Crown employees; ii) where BMJ has agreed a CC-BY licence shall apply, and/or iii) in accordance with the terms applicable for US Federal Government officers or employees acting as part of their official duties; on a worldwide, perpetual, irrevocable, royalty-free basis to BMJ Publishing Group Ltd ("BMJ") its licensees and where the relevant Journal is co-owned by BMJ to the co-owners of the Journal, to publish the Work in this journal and any other BMJ products and to exploit all rights, as set out in our [licence](#).

The Submitting Author accepts and understands that any supply made under these terms is made by BMJ to the Submitting Author unless you are acting as an employee on behalf of your employer or a postgraduate student of an affiliated institution which is paying any applicable article publishing charge ("APC") for Open Access articles. Where the Submitting Author wishes to make the Work available on an Open Access basis (and intends to pay the relevant APC), the terms of reuse of such Open Access shall be governed by a Creative Commons licence – details of these licences and which [Creative Commons](#) licence will apply to this Work are set out in our licence referred to above.

Other than as permitted in any relevant BMJ Author's Self Archiving Policies, I confirm this Work has not been accepted for publication elsewhere, is not being considered for publication elsewhere and does not duplicate material already published. I confirm all authors consent to publication of this Work and authorise the granting of this licence.



1  
2  
3  
4 Who is at risk of occupational Q fever: new insights from a multi-profession cross-sectional study  
5  
6

7 Tanja Groten<sup>1</sup>, Karola Kuenzer<sup>2</sup>, Udo Moog<sup>3</sup>, Beate Hermann<sup>4</sup>, Katrin Maier<sup>5</sup>, Katharina Boden<sup>6</sup>  
8  
9

10 Keywords: shepherd, veterinarian, obstetrician, cattle farmer, *Coxiella burnetii*  
11  
12  
13  
14  
15

16 Department of Obstetrics, University Hospital Jena<sup>1</sup>; Department of Child and Adolescent Psychiatry,  
17 Psychosomatic Medicine and Psychotherapy, University Hospital Jena<sup>2</sup>; Thuringian Animal Health  
18 Service, Jena, Germany<sup>3</sup>; Medical Practice Dr. Thomas Seidel, Weimar, Germany<sup>4</sup>; Institute of  
19 Transfusion Medicine, University Hospital Jena, Germany<sup>5</sup>; Institute of Medical Microbiology,  
20 University Hospital Jena and Dianovis GmbH Greiz, Germany<sup>6</sup>  
21  
22  
23  
24  
25  
26  
27  
28  
29

30 Author for correspondence (including correspondence and requests for reprints):  
31  
32

33 Katharina Boden, Dianovis GmbH Greiz, Wichmannstr. 12, 07973 Greiz, Germany (email:  
34

35 [katharina.boden@dianovis.de](mailto:katharina.boden@dianovis.de))  
36  
37

38 phone: 0049-3661-4644-33  
39

40 fax: 0049-3661-4644-22  
41  
42

43 running head: Q fever as occupational disease  
44  
45  
46

47 word count: 1870  
48  
49  
50  
51  
52  
53  
54  
55  
56  
57  
58  
59  
60

## ABSTRACT

**Objectives:** Q fever is a zoonosis caused by the bacterium *Coxiella burnetii*. It is recognized as an occupational hazard for individuals who are in regular close contact with animal birth products. Data from the literature are not comparable because different serological assays perform very differently in detecting past infections. It is therefore essential to choose the right assay for obtaining reliable data of Q fever seroprevalence. Obstetricians are another profession potentially at risk of Q fever because they can be infected from birth products of women with Q fever during pregnancy. There is little data, however, for Q fever in this occupational group.

Our study therefore had two purposes. The first was to obtain comparable seroprevalence data for different occupational groups by using a single immunoassay, an ELISA with proven excellent sensitivity and specificity for detecting past infections. The second purpose was to obtain data for obstetricians.

**Design:** We carried out a cross-sectional study.

**Setting:** The study included shepherds, cattle farmers, veterinarians and obstetricians from Thuringia.

**Participants:** 77 shepherds, 74 veterinarians, 14 cattle farmers, 17 office employees and 68 obstetricians participated. The control group consisted of 92 blood donors.

**Primary outcome measure:** The primary outcome measure was *Coxiella burnetii* phase II specific IgG. The assay used was evaluated for this purpose in a previous study.

**Results:** Of the 250 blood samples we analysed, the very highest seroprevalences (64-77%) occurred in individuals with frequent animal contact. There were no significant differences between shepherds, cattle farmers, and veterinarians. The seroprevalence in people working in administration was lower but still significantly greater than the control. No obstetricians or midwives tested positive.

**Conclusions:** Shepherds, cattle farmers and veterinarians have a high risk of *C. burnetii* infection. However, our study clearly proves that there was no increased risk for people working in an obstetric department.

### Strengths and limitations of this study

- Undertook a cross sectional study using a serological test with proven excellent performance for this purpose
- Investigated different professional groups with reliable sample sizes.
- First investigation of people working in an obstetric department.
- The study was limited to a single centre.
- Non-random sampling may lead to a bias towards high Q fever seroprevalence.

## INTRODUCTION

Q fever is caused by the bacterium *Coxiella burnetii*. The disease has re-emerged as a significant public health issue in Europe as has been demonstrated by several outbreaks (1-4). The largest of these affected up to 4000 people in the Netherlands between 2007 and 2009 (1). The symptoms of human Q fever are non-specific and the acute disease presents as febrile illness, a flu-like syndrome or pneumonia (5, 6). But the acute disease may pass by asymptotically. Both symptomatic and asymptomatic infections can become chronic, causing endocarditis or vasculitis associated with a high mortality rate (7). Most outbreaks are associated with sheep, cattle and goats (8-10) where *C. burnetii* can be found in high numbers in the amniotic fluid, placenta and foetal membranes of infected animals (11). The extracellular survival form of the bacterium (small cell variant) is highly resistant to environmental stresses such as desiccation (12). This means it can persist in the environment for weeks (13). Human infection then typically occurs by inhalation of contaminated dust or aerosols (14). Infection with *C. burnetii* is an occupational hazard for those who are regularly in close contact with animal birth products. Such groups include farmers, veterinarians, and workers in zoos or abattoirs (15).

*Coxiella burnetii* can also be found in the birth products of women with Q fever during pregnancy and can cause perinatal infections of obstetricians (16).

A meta-analysis of *C. burnetii* seroprevalence among abattoir workers revealed significant heterogeneity among serological tests (17). Different tests also gave very different results for the same people in our evaluation of commercial tests for the detection of past infection (18). Excellent performance was only found for the Panbio-ELISA (PanbioDiagnostics, Korea) (18). We therefore used this assay for a descriptive study of seroprevalence of *C. burnetii* antibodies in people from occupational groups with close animal contact and in people working in an obstetric department.

## METHODS

We conducted a cross-sectional study between 2009 and 2016 that included several at-risk groups. We initially focused on shepherds and veterinarians but offered testing to all interested people. Between 2009 and 2010 we recruited shepherds and veterinarians at several educational meetings of the occupational union for shepherds. And in 2010 we recruited among veterinarians, and also among cattle farmers and office employees, attending a congress for cattle farmers in 2010 (41 of 165 congress participants participated, 25%). In all we were able to include 84 out of about 400 professional shepherds in Thuringia in 2009 and 2010 (21%). The group of office employees consisted of animal welfare inspectors (Tierschutzkontrolleur) and veterinarians, all of whom had sporadic animal contact. In 2011, resampling of blood from people infected with *Coxiella burnetii* during an outbreak six years previously allowed us to evaluate serological assays for the detection of past infection (18). This outbreak with 331 cases occurred in a densely inhabited area of Jena, a town in Thuringia (2). As a result of the validation we found only one assay suitable for seroprevalence studies. We retested all the sera sampled and enlarged the group of veterinarians to obtain a reliable sample size. We increased the number of veterinarians by including some of those attending a number of educational meetings on veterinary medicine and animal health in 2016. To examine the question of the risk for obstetricians we added this occupational group to our study. We did this by attending educational meetings of the occupational union of midwives (proportion of participants is not available). In addition, between January and August 2016, we offered *C. burnetii*-specific antibody testing for all staff of the Department of Obstetrics and Gynaecology, University Hospital Jena (34 out of 50 employees took part, 68%). After obtaining written informed consent, we interviewed people in the different occupational groups. We recorded information about occupational history and contact with sheep, goats and cattle. We specifically asked the participants how long they had

1  
2  
3 been in their occupation and how much they were exposed to ruminants. As most of the  
4 shepherd grew up with intense animal contact, we chose the length of sheep contact instead of  
5 working years for this special group. A blood sample was taken from every interviewee and  
6 the sera were stored at -80°C until antibody testing. Sera of 92 blood donors were tested as a  
7 control-group. The blood donor group consisted of 22 women and 70 men with an average  
8 age of 35 (range 18-67). All members of this group lived in urban areas. The study was  
9 approved by the Ethical Committee of the University Hospital Jena (reference number 2525-  
10 04/09, 4615-11/15).

11  
12 We analysed the sera for *C. burnetii*-Phase II-specific IgG antibodies with the Panbio-ELISA.  
13 The Panbio-ELISA assay was conducted manually according to the instructions of the  
14 manufacturer. The optical densities were read at 450nm with a reference wavelength of  
15 620nm (Sunrise, Tecan).

16  
17 For all calculations we used the Statistical Package for Social Sciences (SPSS version 21,  
18 Chicago, IL, USA). The seroprevalences of the different groups were compared using the  
19 chi-squared test.

#### 20 21 Patient and Public Involvement

22  
23 Patients or the public were not involved in the conceptualization or carrying out of this  
24 research. Study participants received their personal results and recommendations by letter.

## 25 26 **RESULTS**

27  
28 A total of 250 people participated in our study (table 1). The sex ratio of the different  
29 occupational groups ranged from 99% females in the obstetrician group to 90% males in the  
30 shepherd group.

Table 1. Prevalence of *Coxiella burnetii*-Phase II-specific IgG in different occupational settings

| Group            | n  | female:male | age (range)<br>[years] | Time of<br>exposition*<br>(range) | proportion**<br>[%] | p-value   |
|------------------|----|-------------|------------------------|-----------------------------------|---------------------|-----------|
| Blood donors     | 92 | 2:7         | 35 (18-67)             |                                   | 2/92 [2.2]          | reference |
| Shepherds        | 77 | 1:9         | 45 (19-70)             | 28 (0-62)                         | 59/77 [76.6]        | < 0.001   |
| Cattle farmers   | 14 | 1:2         | 52 (32-65)             | 31 (12-54)                        | 9/14 [70.3]         | < 0.001   |
| Veterinarians    | 74 | 1:1         | 45 (24-75)             | 19 (0-50)                         | 52/74 [64.3]        | < 0.001   |
| Office employees | 17 | 3:1         | 46 (26-56)             | 23 (2-36)                         | 7/17 [41.2]         | < 0.001   |
| Obstetricians    | 68 | 99:1        | 44 (24-64)             | 22 (0.5-45)                       | 0/68 [0.0]          | 0.221     |

\* occupational time, except for shepherds where the whole duration of sheep contact was used; \*\*seroprevalence for *C. burnetii*-Phase II-specific IgG

The highest seroprevalences were found for people with frequent animal contact (64-77%).

There were no significant differences between cattle farmers, practising veterinarians and shepherds. The seroprevalence of people working in administration was lower than in those with frequent animal contact but still significantly greater than the control group. None of the obstetrician group was positive for past Q fever infection.

The time of exposure to sheep in shepherds ranged widely from 0 to 62 years (average 28 years). Even the duration of work with animals in the group of veterinarians ranged from 0 to 50 years (average 19 years). However, infection rates in these groups were high even after only a few years of exposure (Figure 1) although the sample size of the different durations of exposure is very small.

## DISCUSSION

1  
2  
3 This is the first seroprevalence study investigating different occupational groups using an  
4 assay validated for detecting past Q fever. Most assays are designed as tools for diagnosing  
5 clinical disease but they give differing results in other contexts. Our evaluation of three  
6 different commercially available ELISA for detection of past *C. burnetii* infection revealed  
7 ROC curves that discriminated well between infected and uninfected individuals. The AUC  
8 ranged from 0.97 to 1.0 (18). However, most antibody levels during the convalescent phase  
9 fall under the cut off titre, in accordance with the study by Blaauw (19). This phenomenon  
10 leads to sensitivities of 42 (Virion/Serion, Germany), 51 (IBL International, Germany) and  
11 100% (Panbio Diagnostics, Korea) with specificity of 94-100% six years after infection (18).  
12 Based on our evaluation data we chose the Panbio-ELISA (sensitivity 100%; specificity 94%)  
13 for our study (18).  
14  
15  
16  
17  
18  
19  
20  
21  
22  
23  
24  
25  
26  
27  
28

29 Cohort composition was based on sampling performed in different occupational groups and  
30 settings. A potential bias cannot be ruled out as people aware of their Q fever contact in the  
31 past may have more interest in being tested than those without such awareness. However, this  
32 bias is likely to be similar for all the occupational groups investigated.  
33  
34  
35  
36  
37  
38

39 We found very high seroprevalence, 70%, in people with close occupational contact with  
40 animals. Seroprevalence was also quite high, 41%, in the group of office employees even  
41 though they had only sporadic animal contact. However, half these people were non-  
42 practising veterinarians who had studied veterinary medicine. Because such students are at  
43 risk of Q fever (20), this finding must be investigated in more detail with a larger sample size.  
44 However, the remarkably high seroprevalences are reliable given the characteristics of the  
45 disease. There are enormous numbers of *C. burnetii* in some placentae ( $10^9$ /g) or milk  
46 ( $10^5$ /ml) (11), the bacterium is highly infective (it has been estimated that a single organism is  
47 able to cause disease), it is highly resistance to environmental stresses (it survives on wool for  
48 7-10 months (12)) and has a flock level prevalence of 28% (21).  
49  
50  
51  
52  
53  
54  
55  
56  
57  
58  
59  
60



1  
2  
3 Seroprevalences in shepherds are generally 29-59% (22, 23) and in veterinarians 10-75% (24,  
4  
5 25). However, these wide ranges are, in part, illusory because the values result from very  
6  
7 different assays, in-house tests and even from tests using different cut off values. In large  
8  
9 seroprevalence studies in the Netherlands 18.7% of veterinary medicine students were  
10  
11 antibody positive as were 66.7% of dairy and 51.5 of non-dairy sheep farm residents and  
12  
13 87.2% of cattle farmers (20, 23, 26). But the situation in the Netherlands differs from that in  
14  
15 Germany as the general seropositivity in the population increased during the large outbreak in  
16  
17 2007. It was 2.3% in 2006-2007 but by 2009 was 25.1% in the epicentre of the outbreak and  
18  
19 12.2% in blood donors in the most Q fever-affected areas (27, 28, 29). Most of these Dutch  
20  
21 studies used immunofluorescence (IFAT). IFAT is regarded as a reference method but several  
22  
23 cut-off titres are used and so standardization is required if they are to be used in  
24  
25 seroprevalence studies (19). The only other study using Panbio-ELISA produced results  
26  
27 similar to ours with 78% for veterinarians and 54% for cattle farmers in Sicily (30).  
28  
29  
30  
31  
32  
33

34 Keeping in mind that more outbreaks are related to sheep than to cattle, it is interesting that  
35  
36 there was no difference in our study between people handling sheep and those handling cattle.  
37  
38 But, to rule out significant bias, a reinvestigation of the group of cattle farmers with an  
39  
40 enlarged sample size is needed. Our findings are in accordance with the finding of Marrie that  
41  
42 slaughtering cattle is a significant risk factor for positive antibody titres (31). We did not  
43  
44 include the interesting group of slaughterhouse workers in our study as there is no  
45  
46 professional slaughterhouse for sheep in Thuringia. About 95% of sheep are slaughtered  
47  
48 outside Thuringia. But a recent metanalysis demonstrates that this group has very high  
49  
50 seroprevalences, of 30-70%, (17).  
51  
52  
53

54 We found much lower seroprevalence in obstetricians than did the only published study  
55  
56 available. This study from the 1970s in Bulgaria used a complement fixation test and revealed  
57  
58 37% positivity for obstetricians compared to 8% positivity in blood donors (32). The  
59  
60

1  
2  
3 discrepancy probably arises from the high hygiene standards of modern obstetrics. The  
4 development of the infective and highly resistant form of *C. burnetii* (small cell variant) is  
5 promoted by desiccation. But obstetrical departments are frequently cleaned and disinfected  
6 and waste is rapidly disposed of so reducing the risk of the small cell variant spreading.  
7  
8 However, the data for obstetricians should be repeated in another area with a larger sample  
9  
10  
11  
12  
13  
14  
15 size.

16  
17  
18 In conclusion, shepherds, veterinarians and cattle farmers, and even people with sporadic  
19 animal contact like employees in veterinary offices, have a high risk of *C. burnetii* infection.  
20  
21  
22 Physicians should therefore consider *C. burnetii* infection as a differential diagnosis for acute  
23 febrile illness as well as for endocarditis and vasculitis in these occupational groups. In  
24  
25  
26  
27 contrast, our study clearly proves that there is no increased risk for people working in an  
28  
29  
30  
31  
32  
33  
34 obstetric department. The already high hygienic standards in obstetrical departments are  
35  
36  
37  
38  
39  
40  
41  
42  
43  
44  
45  
46  
47  
48  
49  
50  
51  
52  
53  
54  
55  
56  
57  
58  
59  
60  
sufficient to keep under control the occupational risk for Q fever.

Figure 1: Antibody-positivity in relation to duration of exposure

\*shepherds: 0-5 years: n=5, 6-10: n=5, 11-20: n=6, 21-30: n=16, 31-40: n=11, >40: n=16

veterinarians: 0-5 years: n=13, 6-10: n=7, 11-20: n=9, 21-30: n=9, 31-40: n=9, >40: n=4

**Contributorship statement** TG and KB conceived the study. TG, KK, UM, KB designed the  
study. KK, UM, BH performed the experiments. TG, KK, KB analysed the data. UM, KM  
provided resources. TG, KK, BH and KB wrote the manuscript. Previous versions of the  
manuscript were edited for English by Dr A. J. Davis (English Experience Language Services,  
Jena, Germany).

**Funding** This work was supported by the Federal Ministry of Education and Research Germany (KB Grant 01 KI 0735, 01 KI 1001C).

**Data sharing statement** Extra data is available by emailing karola.kuenzer@med.uni-jena.de

1. Delsing CE, Kullberg BJ, Bleeker-Rovers CP. Q fever in the Netherlands from 2007 to 2010. *Neth J Med* 2010;**68**(12):382-7.
2. Gilsdorf A, Kroh C, Grimm S, et al. Large Q fever outbreak due to sheep farming near residential areas, Germany, 2005. *Epidemiol Infect* 2008;**136**(8):1084-7.
3. Porten K, Rissland J, Tigges A, et al. A super-spreading ewe infects hundreds with Q fever at a farmers' market in Germany. *BMC Infect Dis* 2006;**6**:147.
4. Varga V. An explosive outbreak of Q-fever in Jedl'ove Kostol'any, Slovakia. *Cent Eur J Public Health* 1997;**5**(4):180-2.
5. Maurin M, Raoult D. Q fever. *Clin Microbiol Rev* 1999;**12**(4):518-53.
6. Parker NR, Barralet JH, Bell AM. Q fever. *The Lancet* 2006;**367**(9511):679-88.
7. Broos PP, Hagenaars JC, Kampschreur LM, et al. Vascular complications and surgical interventions after world's largest Q fever outbreak. *J Vasc Surg* 2015;**62**(5):1273-80.
8. Clark NJ, Soares Magalhaes RJ. Airborne geographical dispersal of Q fever from livestock holdings to human communities: a systematic review and critical appraisal of evidence. *BMC Infect Dis* 2018;**18**(1):218.
9. Hellenbrand W, Breuer T, Petersen L. Changing epidemiology of Q fever in Germany, 1947-1999. *Emerg Infect Dis* 2001;**7**(5):789-96.
10. Georgiev M, Afonso A, Neubauer H, et al. Q fever in humans and farm animals in four European countries, 1982 to 2010. *Euro Surveill* 2013;**18**(8):pii: 20407.
11. Bell EJ, Parker RR, Stoenner HG. Experimental Q fever in cattle. *Am J Public Health Nations Health* 1949;**39**(4):478-84.
12. Christie AB. Q fever. In: Christie AB, ed. *Infectious Diseases: Epidemiology and Clinical Practice*. New York: Churchill Livingstone, 1980:800.
13. Anderson A, Bijlmer H, Fournier PE, et al. Diagnosis and management of Q fever--United States, 2013: recommendations from CDC and the Q Fever Working Group. *MMWR Recomm Rep* 2013;**62**(RR-03):1-30.
14. Raoult D, Marrie T, Mege J. Natural history and pathophysiology of Q fever. *Lancet Infect Dis* 2005;**5**(4):219-26.
15. Garner MG, Longbottom HM, Cannon RM, et al. A review of Q fever in Australia 1991-1994. *Aust N Z J Public Health* 1997;**21**(7):722-30.
16. Stein A, Raoult D. Q fever during pregnancy: a public health problem in southern France. *Clin Infect Dis* 1998;**27**(3):592-6.
17. Woldeyohannes SM, Gilks CF, Baker P, et al. Seroprevalence of *Coxiella burnetii* among abattoir and slaughterhouse workers: A meta-analysis. *One Health* 2018;**6**:23-28.
18. Frosinski J, Hermann B, Maier K, et al. Enzyme-linked immunosorbent assays in seroprevalence studies of Q fever: the need for cut-off adaptation and the consequences for prevalence data. *Epidemiol Infect* 2016;**144**(6):1148-52.
19. Blaauw G J, Notermans D W, Schimmer B, et al. The application of an enzyme-linked immunosorbent assay or an immunofluorescent assay test leads to different estimates of seroprevalence of *Coxiella burnetii* in the population. *Epidemiol Infect.* 2012 Jan;**140**(1):36-41
20. de Rooij MM, Schimmer B, Versteeg B, et al. Risk factors of *Coxiella burnetii* (Q fever) seropositivity in veterinary medicine students. *PloS one* 2012;**7**(2):e32108.

- 1
- 2
- 3
- 4 21. Hilbert A, Schmoock G, Lenzko H, et al. Prevalence of *Coxiella burnetii* in clinically healthy German
- 5 sheep flocks. *BMC Res Notes* 2012;**5**:152.
- 6 22. Dolce P, Belanger MJ, Tumanowicz K, et al. *Coxiella burnetii* seroprevalence of shepherds and
- 7 their flocks in the lower Saint-Lawrence River region of Quebec, Canada. *Can J Infect Dis*
- 8 2003;**14**(2):97-102.
- 9 23. de Lange MM, Schimmer B, Vellema P, et al. *Coxiella burnetii* seroprevalence and risk factors in
- 10 sheep farmers and farm residents in The Netherlands. *Epidemiol Infect* 2014;**142**(6):1231-44.
- 11 24. Thibon M, Villiers V, Souque P, et al. High incidence of *Coxiella burnetii* markers in a rural
- 12 population in France. *Eur J Epidemiol* 1996;**12**(5):509-13.
- 13 25. Nowotny N, Deutz A, Fuchs K, et al. Prevalence of swine influenza and other viral, bacterial, and
- 14 parasitic zoonoses in veterinarians. *J Infect Dis* 1997;**176**(5):1414-5.
- 15 26. Schimmer B, Schotten N, van Engelen E, et al. *Coxiella burnetii* seroprevalence and risk for
- 16 humans on dairy cattle farms, the Netherlands, 2010-2011. *Emerg Infect Dis* 2014;**20**(3):417-
- 17 25.
- 18 27. Schimmer B, Notermans DW, Harms MG, et al. Low seroprevalence of Q fever in The Netherlands
- 19 prior to a series of large outbreaks. *Epidemiol Infect* 2012;**140**(1):27-35.
- 20 28. Karagiannis I, Schimmer B, Van Lier A, et al. Investigation of a Q fever outbreak in a rural area of
- 21 the Netherlands. *Epidemiology and Infection* 2009; 137: 1283-94.
- 22 29. Hogema B M, Slot E, Molier M, et al. *Coxiella burnetii* infection among blood donors during the
- 23 2009 Q-fever outbreak in The Netherlands. *Transfusion* 2012; 52: 144-50
- 24 30. Fenga C, Gangemi S, De Luca A, et al. Seroprevalence and occupational risk survey for *Coxiella*
- 25 *burnetii* among exposed workers in Sicily, Southern Italy. *Int J Occup Med Environ Health*
- 26 2015;**28**(5):901-7.
- 27 31. Marrie TJ, Fraser J. Prevalence of Antibodies to *Coxiella burnetii* Among Veterinarians and
- 28 Slaughterhouse Workers in Nova Scotia. *Can Vet J* 1985;**26**(6):181-4.
- 29 32. Ganchev N, Serbezov V, Alexandrov E. Incidence of Q fever in two inadequately investigated
- 30 occupational groups. *J Hyg Epidemiol Microbiol Immunol* 1977;**21**(4):405-1
- 31
- 32
- 33
- 34
- 35
- 36
- 37
- 38
- 39
- 40
- 41
- 42
- 43
- 44
- 45
- 46
- 47
- 48
- 49
- 50
- 51
- 52
- 53
- 54
- 55
- 56
- 57
- 58
- 59
- 60

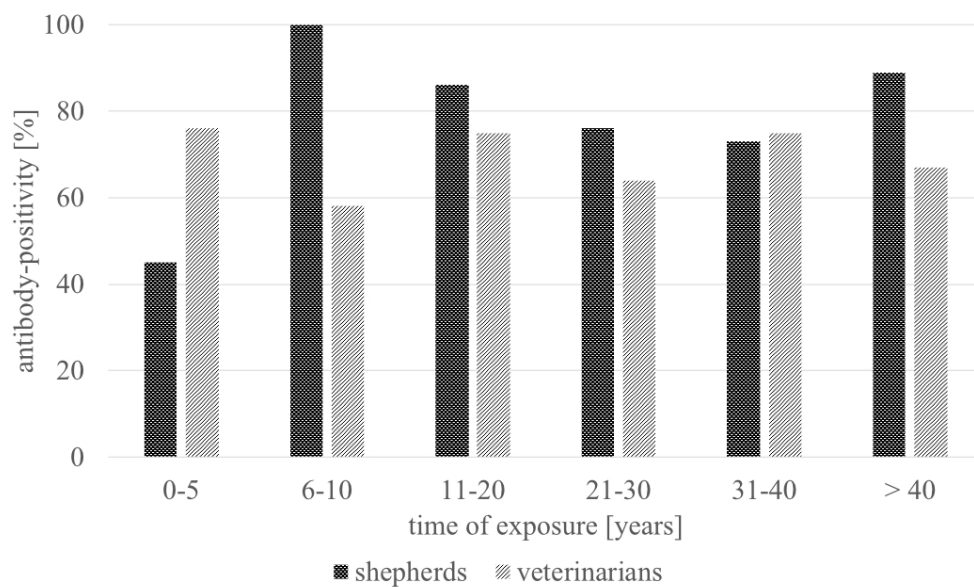

Figure 1: Antibody-positivity in relation to duration of exposure  
\*shepherds: 0-5 years: n=5, 6-10: n=5, 11-20: n=6, 21-30: n=16, 31-40: n=11, >40: n=16  
veterinarians: 0-5 years: n=13, 6-10: n=7, 11-20: n=9, 21-30: n=9, 31-40: n=9, >40: n=4

90x90mm (300 x 300 DPI)

**STROBE 2007 (v4) Statement—Checklist of items that should be included in reports of *cross-sectional studies***

| Section/Topic                | Item # | Recommendation                                                                                                                                                                       | Reported on page # |
|------------------------------|--------|--------------------------------------------------------------------------------------------------------------------------------------------------------------------------------------|--------------------|
| <b>Title and abstract</b>    | 1      | (a) Indicate the study's design with a commonly used term in the title or the abstract                                                                                               | 1                  |
|                              |        | (b) Provide in the abstract an informative and balanced summary of what was done and what was found                                                                                  | 2                  |
| <b>Introduction</b>          |        |                                                                                                                                                                                      |                    |
| Background/rationale         | 2      | Explain the scientific background and rationale for the investigation being reported                                                                                                 | 4                  |
| Objectives                   | 3      | State specific objectives, including any prespecified hypotheses                                                                                                                     | 4                  |
| <b>Methods</b>               |        |                                                                                                                                                                                      |                    |
| Study design                 | 4      | Present key elements of study design early in the paper                                                                                                                              | 5                  |
| Setting                      | 5      | Describe the setting, locations, and relevant dates, including periods of recruitment, exposure, follow-up, and data collection                                                      | 5                  |
| Participants                 | 6      | (a) Give the eligibility criteria, and the sources and methods of selection of participants                                                                                          | 5                  |
| Variables                    | 7      | Clearly define all outcomes, exposures, predictors, potential confounders, and effect modifiers. Give diagnostic criteria, if applicable                                             | 5                  |
| Data sources/<br>measurement | 8*     | For each variable of interest, give sources of data and details of methods of assessment (measurement). Describe comparability of assessment methods if there is more than one group | 5                  |
| Bias                         | 9      | Describe any efforts to address potential sources of bias                                                                                                                            | 7                  |
| Study size                   | 10     | Explain how the study size was arrived at                                                                                                                                            | 5                  |
| Quantitative variables       | 11     | Explain how quantitative variables were handled in the analyses. If applicable, describe which groupings were chosen and why                                                         | 5                  |
| Statistical methods          | 12     | (a) Describe all statistical methods, including those used to control for confounding                                                                                                | 5                  |
|                              |        | (b) Describe any methods used to examine subgroups and interactions                                                                                                                  | 5                  |
|                              |        | (c) Explain how missing data were addressed                                                                                                                                          | No missing data    |
|                              |        | (d) If applicable, describe analytical methods taking account of sampling strategy                                                                                                   |                    |
|                              |        | (e) Describe any sensitivity analyses                                                                                                                                                | 6                  |
| <b>Results</b>               |        |                                                                                                                                                                                      |                    |

|                          |     |                                                                                                                                                                                                              |                 |
|--------------------------|-----|--------------------------------------------------------------------------------------------------------------------------------------------------------------------------------------------------------------|-----------------|
| Participants             | 13* | (a) Report numbers of individuals at each stage of study—eg numbers potentially eligible, examined for eligibility, confirmed eligible, included in the study, completing follow-up, and analysed            | 6               |
|                          |     | (b) Give reasons for non-participation at each stage                                                                                                                                                         | 7               |
|                          |     | (c) Consider use of a flow diagram                                                                                                                                                                           |                 |
| Descriptive data         | 14* | (a) Give characteristics of study participants (eg demographic, clinical, social) and information on exposures and potential confounders                                                                     | 6               |
|                          |     | (b) Indicate number of participants with missing data for each variable of interest                                                                                                                          | No missing data |
| Outcome data             | 15* | Report numbers of outcome events or summary measures                                                                                                                                                         | 6               |
| Main results             | 16  | (a) Give unadjusted estimates and, if applicable, confounder-adjusted estimates and their precision (eg, 95% confidence interval). Make clear which confounders were adjusted for and why they were included |                 |
|                          |     | (b) Report category boundaries when continuous variables were categorized                                                                                                                                    |                 |
|                          |     | (c) If relevant, consider translating estimates of relative risk into absolute risk for a meaningful time period                                                                                             |                 |
| Other analyses           | 17  | Report other analyses done—eg analyses of subgroups and interactions, and sensitivity analyses                                                                                                               |                 |
| <b>Discussion</b>        |     |                                                                                                                                                                                                              |                 |
| Key results              | 18  | Summarise key results with reference to study objectives                                                                                                                                                     | 7               |
| Limitations              | 19  | Discuss limitations of the study, taking into account sources of potential bias or imprecision. Discuss both direction and magnitude of any potential bias                                                   | 7               |
| Interpretation           | 20  | Give a cautious overall interpretation of results considering objectives, limitations, multiplicity of analyses, results from similar studies, and other relevant evidence                                   | 8               |
| Generalisability         | 21  | Discuss the generalisability (external validity) of the study results                                                                                                                                        | 8               |
| <b>Other information</b> |     |                                                                                                                                                                                                              |                 |
| Funding                  | 22  | Give the source of funding and the role of the funders for the present study and, if applicable, for the original study on which the present article is based                                                | 9               |

\*Give information separately for cases and controls in case-control studies and, if applicable, for exposed and unexposed groups in cohort and cross-sectional studies.

**Note:** An Explanation and Elaboration article discusses each checklist item and gives methodological background and published examples of transparent reporting. The STROBE checklist is best used in conjunction with this article (freely available on the Web sites of PLoS Medicine at <http://www.plosmedicine.org/>, Annals of Internal Medicine at <http://www.annals.org/>, and Epidemiology at <http://www.epidem.com/>). Information on the STROBE Initiative is available at [www.strobe-statement.org](http://www.strobe-statement.org).

# BMJ Open

## Who is at risk of occupational Q fever: new insights from a multi-profession cross-sectional study

|                                 |                                                                                                                                                                                                                                                                                                                                                                                                                                             |
|---------------------------------|---------------------------------------------------------------------------------------------------------------------------------------------------------------------------------------------------------------------------------------------------------------------------------------------------------------------------------------------------------------------------------------------------------------------------------------------|
| Journal:                        | <i>BMJ Open</i>                                                                                                                                                                                                                                                                                                                                                                                                                             |
| Manuscript ID                   | bmjopen-2019-030088.R2                                                                                                                                                                                                                                                                                                                                                                                                                      |
| Article Type:                   | Original research                                                                                                                                                                                                                                                                                                                                                                                                                           |
| Date Submitted by the Author:   | 31-Oct-2019                                                                                                                                                                                                                                                                                                                                                                                                                                 |
| Complete List of Authors:       | Groten, Tanja; Universitätsklinikum Jena (University Hospital Jena), Department of Obstetrics<br>Kuenzer, Karola; Universitätsklinikum Jena (University Hospital Jena)<br>Moog, Udo; Thuringian Animal Health Service<br>Hermann, Beate; Medical Practice Dr. Thomas Seidel<br>Maier, Katrin; Universitätsklinikum Jena (University Hospital Jena)<br>Boden, Katharina; Dianovis GmbH; Universitätsklinikum Jena (University Hospital Jena) |
| <b>Primary Subject Heading</b>: | Infectious diseases                                                                                                                                                                                                                                                                                                                                                                                                                         |
| Secondary Subject Heading:      | Epidemiology, Obstetrics and gynaecology, Occupational and environmental medicine, Public health                                                                                                                                                                                                                                                                                                                                            |
| Keywords:                       | shepherd, veterinarian, obstetrician, cattle farmer, <i>Coxiella burnetii</i>                                                                                                                                                                                                                                                                                                                                                               |
|                                 |                                                                                                                                                                                                                                                                                                                                                                                                                                             |

SCHOLARONE™  
Manuscripts





I, the Submitting Author has the right to grant and does grant on behalf of all authors of the Work (as defined in the below author licence), an exclusive licence and/or a non-exclusive licence for contributions from authors who are: i) UK Crown employees; ii) where BMJ has agreed a CC-BY licence shall apply, and/or iii) in accordance with the terms applicable for US Federal Government officers or employees acting as part of their official duties; on a worldwide, perpetual, irrevocable, royalty-free basis to BMJ Publishing Group Ltd ("BMJ") its licensees and where the relevant Journal is co-owned by BMJ to the co-owners of the Journal, to publish the Work in this journal and any other BMJ products and to exploit all rights, as set out in our [licence](#).

The Submitting Author accepts and understands that any supply made under these terms is made by BMJ to the Submitting Author unless you are acting as an employee on behalf of your employer or a postgraduate student of an affiliated institution which is paying any applicable article publishing charge ("APC") for Open Access articles. Where the Submitting Author wishes to make the Work available on an Open Access basis (and intends to pay the relevant APC), the terms of reuse of such Open Access shall be governed by a Creative Commons licence – details of these licences and which [Creative Commons](#) licence will apply to this Work are set out in our licence referred to above.

Other than as permitted in any relevant BMJ Author's Self Archiving Policies, I confirm this Work has not been accepted for publication elsewhere, is not being considered for publication elsewhere and does not duplicate material already published. I confirm all authors consent to publication of this Work and authorise the granting of this licence.

1  
2  
3  
4 Who is at risk of occupational Q fever: new insights from a multi-profession cross-sectional study  
5  
6

7 Tanja Groten<sup>1</sup>, Karola Kuenzer<sup>2</sup>, Udo Moog<sup>3</sup>, Beate Hermann<sup>4</sup>, Katrin Maier<sup>5</sup>, Katharina Boden<sup>6</sup>  
8  
9

10 Keywords: shepherd, veterinarian, obstetrician, cattle farmer, *Coxiella burnetii*  
11  
12  
13  
14  
15

16 Department of Obstetrics, University Hospital Jena<sup>1</sup>; Department of Child and Adolescent Psychiatry,  
17 Psychosomatic Medicine and Psychotherapy, University Hospital Jena<sup>2</sup>; Thuringian Animal Health  
18 Service, Jena, Germany<sup>3</sup>; Medical Practice Dr. Thomas Seidel, Weimar, Germany<sup>4</sup>; Institute of  
19 Transfusion Medicine, University Hospital Jena, Germany<sup>5</sup>; Institute of Medical Microbiology,  
20 University Hospital Jena and Dianovis GmbH Greiz, Germany<sup>6</sup>  
21  
22  
23  
24  
25  
26  
27  
28  
29

30 Author for correspondence (including correspondence and requests for reprints):  
31  
32

33 Katharina Boden, Dianovis GmbH Greiz, Wichmannstr. 12, 07973 Greiz, Germany (email:  
34

35 [katharina.boden@dianovis.de](mailto:katharina.boden@dianovis.de))  
36  
37

38 phone: 0049-3661-4644-33  
39

40 fax: 0049-3661-4644-22  
41  
42

43 running head: Q fever as occupational disease  
44  
45  
46

47 word count: 2091  
48  
49  
50  
51  
52  
53  
54  
55  
56  
57  
58  
59  
60

## ABSTRACT

**Objectives:** Q fever is a zoonosis caused by the bacterium *Coxiella burnetii*. It is recognized as an occupational hazard for individuals who are in regular contact with animal birth products. Data from the literature are not comparable because different serological assays perform very differently in detecting past infections. It is therefore essential to choose the right assay for obtaining reliable data of seroprevalence. Obstetricians are another profession potentially at risk of Q fever. They can be infected from birth products of women with Q fever during pregnancy. There is little data, however, for Q fever in this occupational group.

Our study therefore had two purposes. The first was to obtain reliable seroprevalence data for occupational groups in regular contact with animal birth products by using an assay with proven excellent sensitivity and specificity for detecting past infections. The second purpose was to obtain primary data for obstetricians.

**Design:** We carried out a cross-sectional study.

**Setting:** The study included shepherds, cattle farmers, veterinarians and obstetricians from Thuringia.

**Participants:** 77 shepherds, 74 veterinarians, 14 cattle farmers, 17 office employees and 68 obstetricians participated. The control group consisted of 92 blood donors.

**Primary outcome measure:** The primary outcome measure was *Coxiella burnetii* phase II specific IgG. The assay used was evaluated for this purpose in a previous study.

**Results:** Of the 250 blood samples we analysed, the very highest seroprevalences (64-77%) occurred in individuals with frequent animal contact. There were no significant differences between shepherds, cattle farmers, and veterinarians. The seroprevalence in people working in administration was lower but still significantly greater than the control. No obstetricians or midwives tested positive.

**Conclusions:** Shepherds, cattle farmers and veterinarians have a high risk of *C. burnetii* infection. However, our study clearly proves that there was no increased risk for people working in an obstetric department.

### Strengths and limitations of this study

- Undertook a cross sectional study using a serological test with proven excellent performance for this purpose
- Investigated different professional groups with reliable sample sizes.
- First investigation of people working in an obstetric department.
- The study was limited to a single centre.
- Non-random sampling may lead to a bias towards high Q fever seroprevalence.

For peer review only

## INTRODUCTION

Q fever is caused by the bacterium *Coxiella burnetii*. The disease has re-emerged as a significant public health issue in Europe as has been demonstrated by several outbreaks (1-4). The largest of these affected up to 4000 people in the Netherlands between 2007 and 2009 (1). The symptoms of human Q fever are non-specific and the acute disease presents as febrile illness, a flu-like syndrome or pneumonia (5, 6). But the acute disease may pass by asymptotically. Both symptomatic and asymptomatic infections can become chronic, causing endocarditis or vasculitis associated with a high mortality rate (7). Most outbreaks are associated with sheep, cattle and goats (8-10) where *C. burnetii* can be found in high numbers in the amniotic fluid, placenta and foetal membranes of infected animals (11). The extracellular survival form of the bacterium (small cell variant) is highly resistant to environmental stresses such as desiccation (12). This means it can persist in the environment for weeks (13). Human infection then typically occurs by inhalation of contaminated dust or aerosols (14). Infection with *C. burnetii* is an occupational hazard for those who are regularly in close contact with animal birth products. Such groups include farmers, veterinarians, and workers in zoos or abattoirs (15).

*Coxiella burnetii* can also be found in the birth products of women with Q fever during pregnancy and can cause perinatal infections of obstetricians (16). But there are uncertainties about the real risk.

A meta-analysis of *C. burnetii* seroprevalence among abattoir workers revealed significant heterogeneity among serological tests (17). Different tests also gave very different results for the same people in our evaluation of commercial tests for the detection of past infection (18). Excellent performance was only found for the Panbio-ELISA (PanbioDiagnostics, Korea) (18). We therefore used this assay to get reliable seroprevalence data for occupational groups with close animal contact and to obtain primary data for people working in an obstetric department.

## METHODS

We conducted a cross-sectional study between 2009 and 2016 that included several at-risk groups. We initially focused on shepherds and veterinarians but offered testing to all interested people. Between 2009 and 2010 we recruited shepherds and veterinarians at several educational meetings of the occupational union for shepherds. And in 2010 we recruited among veterinarians, and also among cattle farmers and office employees, attending a congress for cattle farmers in 2010 (41 of 165 congress participants participated, 25%). In all we were able to include 84 out of about 400 professional shepherds in Thuringia in 2009 and 2010 (21%). The group of office employees consisted of animal welfare inspectors (Tierschutzkontrolleur) and veterinarians, all of whom had sporadic animal contact. In 2011, resampling of blood from people infected with *Coxiella burnetii* during an outbreak six years previously allowed us to evaluate serological assays for the detection of past infection (18). This outbreak with 331 cases occurred in a densely inhabited area of Jena, a town in Thuringia (2). As a result of the validation we found only one assay suitable for seroprevalence studies. We retested all the sera sampled and enlarged the group of veterinarians to obtain a reliable sample size. We increased the number of veterinarians by including some of those attending a number of educational meetings on veterinary medicine and animal health in 2016. To examine the question of the risk for obstetricians we added this occupational group to our study. We did this by attending educational meetings of the occupational union of midwives (proportion of participants is not available). In addition, between January and August 2016, we offered *C. burnetii*-specific antibody testing for all staff of the Department of Obstetrics and Gynaecology, University Hospital Jena (34 out of 50 employees took part, 68%). After obtaining written informed consent, we interviewed people in the different occupational groups. We recorded information about occupational history and contact with sheep, goats and cattle. We specifically asked the participants how long they had

1  
2  
3 been in their occupation and how much they were exposed to ruminants. As most of the  
4 shepherd grew up with intense animal contact, we chose the length of sheep contact instead of  
5 working years for this special group. A blood sample was taken from every interviewee and  
6 the sera were stored at -80°C until antibody testing. Sera of 92 blood donors were tested as a  
7 control-group. The blood donor group consisted of 22 women and 70 men with an average  
8 age of 35 (range 18-67). All members of this group lived in urban areas. The study was  
9 approved by the Ethical Committee of the University Hospital Jena (reference number 2525-  
10 04/09, 4615-11/15).

11  
12 We analysed the sera for *C. burnetii*-Phase II-specific IgG antibodies with the Panbio-ELISA.  
13 The Panbio-ELISA assay was conducted manually according to the instructions of the  
14 manufacturer. The optical densities were read at 450nm with a reference wavelength of  
15 620nm (Sunrise, Tecan).

16  
17 For all calculations we used the Statistical Package for Social Sciences (SPSS version 21,  
18 Chicago, IL, USA). The seroprevalences of the different groups were compared using the  
19 chi-squared test.

#### 20 21 Patient and Public Involvement

22  
23 Patients or the public were not involved in the conceptualization or carrying out of this  
24 research. Study participants received their personal results and recommendations by letter.

## 25 26 **RESULTS**

27  
28 A total of 250 people participated in our study (table 1). The sex ratio of the different  
29 occupational groups ranged from 99% females in the obstetrician group to 90% males in the  
30 shepherd group.

Table 1. Prevalence of *Coxiella burnetii*-Phase II-specific IgG in different occupational settings

| Group            | n  | female:male | age (range)<br>[years] | Time of<br>exposition*<br>(range)<br>[years] | proportion**<br>[%] | p-value   |
|------------------|----|-------------|------------------------|----------------------------------------------|---------------------|-----------|
| Blood donors     | 92 | 2:7         | 35 (18-67)             |                                              | 2/92 [2.2]          | reference |
| Shepherds        | 77 | 1:9         | 45 (19-70)             | 28 (0-62)                                    | 59/77 [76.6]        | < 0.001   |
| Cattle farmers   | 14 | 1:2         | 52 (32-65)             | 31 (12-54)                                   | 9/14 [70.3]         | < 0.001   |
| Veterinarians    | 74 | 1:1         | 45 (24-75)             | 19 (0-50)                                    | 52/74 [64.3]        | < 0.001   |
| Office employees | 17 | 3:1         | 46 (26-56)             | 23 (2-36)                                    | 7/17 [41.2]         | < 0.001   |
| Obstetricians    | 68 | 99:1        | 44 (24-64)             | 22 (0.5-45)                                  | 0/68 [0.0]          | 0.221     |

\* occupational time, except for shepherds where the whole duration of sheep contact was used; \*\*seroprevalence for *C. burnetii*-Phase II-specific IgG

The highest seroprevalences were found for people with frequent animal contact (64-77%).

There were no significant differences between cattle farmers, practising veterinarians and shepherds. The seroprevalence of people working in administration was lower than in those with frequent animal contact but still significantly greater than the control group. None of the obstetrician group was positive for past Q fever infection.

The time of exposure to sheep in shepherds ranged widely from 0 to 62 years (average 28 years). Even the duration of work with animals in the group of veterinarians ranged from 0 to 50 years (average 19 years). However, infection rates in these groups were high even after only a few years of exposure (Figure 1) although the sample size of the different durations of exposure is very small.

## DISCUSSION



1  
2  
3 This is the first seroprevalence study investigating different occupational groups using an  
4 assay validated for detecting past Q fever. Most assays are designed as tools for diagnosing  
5 clinical disease but they give differing results in other contexts. Our evaluation of three  
6 different commercially available ELISA for detection of past *C. burnetii* infection revealed  
7 ROC curves that discriminated well between infected and uninfected individuals. The AUC  
8 ranged from 0.97 to 1.0 (18). However, most antibody levels during the convalescent phase  
9 fall under the cut off titre, in accordance with the study by Blaauw (19). This phenomenon  
10 leads to sensitivities of 42 (Virion/Serion, Germany), 51 (IBL International, Germany) and  
11 100% (Panbio Diagnostics, Korea) with specificity of 94-100% six years after infection (18).  
12 Based on our evaluation data we chose the Panbio-ELISA (sensitivity 100%; specificity 94%)  
13 for our study (18).  
14  
15  
16  
17  
18  
19  
20  
21  
22  
23  
24  
25  
26  
27  
28

29 Cohort composition was based on sampling performed in different occupational groups and  
30 settings. The first specimens collected during 2009 and 2010 were tested with the  
31 Virion/Serion-ELISA and revealed questionable results. Several people with close contact to  
32 animals with Q fever history showed negative results, despite the high infectivity of *C.*  
33 *burnetii*. Knowing that the used assay was only evaluated for acute disease, we supposed an  
34 insufficient test performance for detecting past infection. Potentially antibody levels could  
35 have fallen under the cut off. We evaluated different assays for this purpose and found the  
36 Panbio-ELISA of excellent performance for seroprevalence detection (18). We retested our  
37 samples and enlarged our study group until 2016. From the epidemiological point of view the  
38 rather long period of recruitment may bias our results. However, the actual stable living and  
39 working conditions of our study group especially the shepherds minimise the risk of bias. A  
40 potential bias due to non-random sampling cannot be ruled out as people aware of their Q  
41 fever contact in the past may have more interest in being tested than those without such  
42  
43  
44  
45  
46  
47  
48  
49  
50  
51  
52  
53  
54  
55  
56  
57  
58  
59  
60

1  
2  
3 awareness. However, this bias is likely to be similar for all the occupational groups  
4  
5 investigated. Another limitation might be the restriction to one single centre.  
6  
7

8 We found very high seroprevalence, 70%, in people with close occupational contact with  
9  
10 animals. Seroprevalence was also quite high, 41%, in the group of office employees even  
11  
12 though they had only sporadic animal contact. However, half these people were non-  
13  
14 practising veterinarians who had studied veterinary medicine. Because such students are at  
15  
16 risk of Q fever (20), this finding must be investigated in more detail with a larger sample size.  
17  
18 However, the remarkably high seroprevalences are reliable given the characteristics of the  
19  
20 disease. There are enormous numbers of *C. burnetii* in some placentae ( $10^9$ /g) or milk  
21  
22 ( $10^5$ /ml) (11), the bacterium is highly infective (it has been estimated that a single organism is  
23  
24 able to cause disease), it is highly resistance to environmental stresses (it survives on wool for  
25  
26 7-10 months (12)) and has a flock level prevalence of 28% (21).  
27  
28  
29  
30  
31

32 Seroprevalences in shepherds are generally 29-59% (22, 23) and in veterinarians 10-75% (24,  
33  
34 25). However, these wide ranges are, in part, illusory because the values result from very  
35  
36 different assays, in-house tests and even from tests using different cut off values. In large  
37  
38 seroprevalence studies in the Netherlands 18.7% of veterinary medicine students were  
39  
40 antibody positive as were 66.7% of dairy and 51.5 of non-dairy sheep farm residents and  
41  
42 87.2% of cattle farmers (20, 23, 26). But the situation in the Netherlands differs from that in  
43  
44 Germany as the general seropositivity in the population increased during the large outbreak in  
45  
46 2007. It was 2.3% in 2006-2007 but by 2009 was 25.1% in the epicentre of the outbreak and  
47  
48 12.2% in blood donors in the most Q fever-affected areas (27, 28, 29). Most of these Dutch  
49  
50 studies used immunofluorescence (IFAT). IFAT is regarded as a reference method but several  
51  
52 cut-off titres are used and so standardization is required if they are to be used in  
53  
54 seroprevalence studies (19). The only other study using Panbio-ELISA produced results  
55  
56 similar to ours with 78% for veterinarians and 54% for cattle farmers in Sicily (30).  
57  
58  
59  
60

1  
2  
3 Keeping in mind that more outbreaks are related to sheep than to cattle, it is interesting that  
4  
5 there was no difference in our study between people handling sheep and those handling cattle.  
6  
7 But, to rule out significant bias, a reinvestigation of the group of cattle farmers with an  
8  
9 enlarged sample size is needed. Our findings are in accordance with the finding of Marrie that  
10  
11 slaughtering cattle is a significant risk factor for positive antibody titres (31). We did not  
12  
13 include the interesting group of slaughterhouse workers in our study as there is no  
14  
15 professional slaughterhouse for sheep in Thuringia. About 95% of sheep are slaughtered  
16  
17 outside Thuringia. But a recent metanalysis demonstrates that this group has very high  
18  
19 seroprevalences, of 30-70%, (17).  
20  
21  
22

23  
24 We found much lower seroprevalence in obstetricians than did the only published study  
25  
26 available. This study from the 1970s in Bulgaria used a complement fixation test and revealed  
27  
28 37% positivity for obstetricians compared to 8% positivity in blood donors (32). The  
29  
30 discrepancy probably arises from the high hygiene standards of modern obstetrics. The  
31  
32 development of the infective and highly resistant form of *C. burnetii* (small cell variant) is  
33  
34 promoted by desiccation. But obstetrical departments are frequently cleaned and disinfected  
35  
36 and waste is rapidly disposed of so reducing the risk of the small cell variant spreading.  
37  
38 However, the data for obstetricians should be repeated in another area with a larger sample  
39  
40 size.  
41  
42  
43  
44

45  
46 In conclusion, shepherds, veterinarians and cattle farmers, and even people with sporadic  
47  
48 animal contact like employees in veterinary offices, have a high risk of *C. burnetii* infection.  
49  
50 Physicians should therefore consider *C. burnetii* infection as a differential diagnosis for acute  
51  
52 febrile illness as well as for endocarditis and vasculitis in these occupational groups. In  
53  
54 contrast, our study clearly proves that there is no increased risk for people working in an  
55  
56 obstetric department. The already high hygienic standards in obstetrical departments are  
57  
58 sufficient to keep under control the occupational risk for Q fever.  
59  
60

1  
2  
3 Figure 1: Antibody-positivity in relation to duration of exposure  
4  
5

6 \*shepherds: 0-5 years: n=5, 6-10: n=5, 11-20: n=6, 21-30: n=16, 31-40: n=11, >40: n=16  
7

8 veterinarians: 0-5 years: n=13, 6-10: n=7, 11-20: n=9, 21-30: n=9, 31-40: n=9, >40: n=4  
9  
10  
11  
12  
13

14 **Contributorship statement** TG and KB conceived the study. TG, KK, UM, KB designed the  
15 study. KK, UM, BH performed the experiments. TG, KK, KB analysed the data. UM, KM  
16 provided resources. TG, KK, BH and KB wrote the manuscript.  
17  
18  
19  
20  
21  
22  
23  
24

25 **Funding** This work was supported by the Federal Ministry of Education and Research  
26 Germany (KB Grant 01 KI 0735, 01 KI 1001C).  
27  
28  
29

30 **Competing interests** The authors declare that they have no competing interests.  
31  
32  
33

34 **Data sharing statement** Extra data is available by emailing karola.kuenzer@med.uni-jena.de  
35  
36

37 **Acknowledgements** The authors want to thank Dr A. J. Davis (EnglishExperience Language  
38 Services, Jena, Germany) for his excellent support in editing the manuscript.  
39  
40  
41

- 42  
43  
44  
45  
46  
47  
48  
49  
50  
51  
52  
53  
54  
55  
56  
57  
58  
59  
60
1. Delsing CE, Kullberg BJ, Bleeker-Rovers CP. Q fever in the Netherlands from 2007 to 2010. *Neth J Med* 2010;**68**(12):382-7.
  2. Gilsdorf A, Kroh C, Grimm S, et al. Large Q fever outbreak due to sheep farming near residential areas, Germany, 2005. *Epidemiol Infect* 2008;**136**(8):1084-7.
  3. Porten K, Rissland J, Tigges A, et al. A super-spreading ewe infects hundreds with Q fever at a farmers' market in Germany. *BMC Infect Dis* 2006;**6**:147.
  4. Varga V. An explosive outbreak of Q-fever in Jedl'ove Kostol'any, Slovakia. *Cent Eur J Public Health* 1997;**5**(4):180-2.
  5. Maurin M, Raoult D. Q fever. *Clin Microbiol Rev* 1999;**12**(4):518-53.
  6. Parker NR, Barralet JH, Bell AM. Q fever. *The Lancet* 2006;**367**(9511):679-88.
  7. Broos PP, Hagenaars JC, Kampschreur LM, et al. Vascular complications and surgical interventions after world's largest Q fever outbreak. *J Vasc Surg* 2015;**62**(5):1273-80.
  8. Clark NJ, Soares Magalhaes RJ. Airborne geographical dispersal of Q fever from livestock holdings to human communities: a systematic review and critical appraisal of evidence. *BMC Infect Dis* 2018;**18**(1):218.
  9. Hellenbrand W, Breuer T, Petersen L. Changing epidemiology of Q fever in Germany, 1947-1999. *Emerg Infect Dis* 2001;**7**(5):789-96.

10. Georgiev M, Afonso A, Neubauer H, et al. Q fever in humans and farm animals in four European countries, 1982 to 2010. *Euro Surveill* 2013;**18**(8):pii: 20407.
11. Bell EJ, Parker RR, Stoenner HG. Experimental Q fever in cattle. *Am J Public Health Nations Health* 1949;**39**(4):478-84.
12. Christie AB. Q fever. In: Christie AB, ed. *Infectious Diseases: Epidemiology and Clinical Practice*. New York: Churchill Livingstone, 1980:800.
13. Anderson A, Bijlmer H, Fournier PE, et al. Diagnosis and management of Q fever--United States, 2013: recommendations from CDC and the Q Fever Working Group. *MMWR Recomm Rep* 2013;**62**(RR-03):1-30.
14. Raoult D, Marrie T, Mege J. Natural history and pathophysiology of Q fever. *Lancet Infect Dis* 2005;**5**(4):219-26.
15. Garner MG, Longbottom HM, Cannon RM, et al. A review of Q fever in Australia 1991-1994. *Aust N Z J Public Health* 1997;**21**(7):722-30.
16. Stein A, Raoult D. Q fever during pregnancy: a public health problem in southern France. *Clin Infect Dis* 1998;**27**(3):592-6.
17. Woldeyohannes SM, Gilks CF, Baker P, et al. Seroprevalence of *Coxiella burnetii* among abattoir and slaughterhouse workers: A meta-analysis. *One Health* 2018;**6**:23-28.
18. Frosinski J, Hermann B, Maier K, et al. Enzyme-linked immunosorbent assays in seroprevalence studies of Q fever: the need for cut-off adaptation and the consequences for prevalence data. *Epidemiol Infect* 2016;**144**(6):1148-52.
19. Blaauw G J, Notermans D W, Schimmer B, et al. The application of an enzyme-linked immunosorbent assay or an immunofluorescent assay test leads to different estimates of seroprevalence of *Coxiella burnetii* in the population. *Epidemiol Infect.* 2012 Jan;**140**(1):36-41
20. de Rooij MM, Schimmer B, Versteeg B, et al. Risk factors of *Coxiella burnetii* (Q fever) seropositivity in veterinary medicine students. *PloS one* 2012;**7**(2):e32108.
21. Hilbert A, Schmoock G, Lenzko H, et al. Prevalence of *Coxiella burnetii* in clinically healthy German sheep flocks. *BMC Res Notes* 2012;**5**:152.
22. Dolce P, Belanger MJ, Tumanowicz K, et al. *Coxiella burnetii* seroprevalence of shepherds and their flocks in the lower Saint-Lawrence River region of Quebec, Canada. *Can J Infect Dis* 2003;**14**(2):97-102.
23. de Lange MM, Schimmer B, Vellema P, et al. *Coxiella burnetii* seroprevalence and risk factors in sheep farmers and farm residents in The Netherlands. *Epidemiol Infect* 2014;**142**(6):1231-44.
24. Thibon M, Villiers V, Souque P, et al. High incidence of *Coxiella burnetii* markers in a rural population in France. *Eur J Epidemiol* 1996;**12**(5):509-13.
25. Nowotny N, Deutz A, Fuchs K, et al. Prevalence of swine influenza and other viral, bacterial, and parasitic zoonoses in veterinarians. *J Infect Dis* 1997;**176**(5):1414-5.
26. Schimmer B, Schotten N, van Engelen E, et al. *Coxiella burnetii* seroprevalence and risk for humans on dairy cattle farms, the Netherlands, 2010-2011. *Emerg Infect Dis* 2014;**20**(3):417-25.
27. Schimmer B, Notermans DW, Harms MG, et al. Low seroprevalence of Q fever in The Netherlands prior to a series of large outbreaks. *Epidemiol Infect* 2012;**140**(1):27-35.
28. Karagiannis I, Schimmer B, Van Lier A, et al. Investigation of a Q fever outbreak in a rural area of the Netherlands. *Epidemiology and Infection* 2009; **137**: 1283-94.
29. Hogema B M, Slot E, Molier M, et al. *Coxiella burnetii* infection among blood donors during the 2009 Q-fever outbreak in The Netherlands. *Transfusion* 2012; **52**: 144-50
30. Fenga C, Gangemi S, De Luca A, et al. Seroprevalence and occupational risk survey for *Coxiella burnetii* among exposed workers in Sicily, Southern Italy. *Int J Occup Med Environ Health* 2015;**28**(5):901-7.
31. Marrie TJ, Fraser J. Prevalence of Antibodies to *Coxiella burnetii* Among Veterinarians and Slaughterhouse Workers in Nova Scotia. *Can Vet J* 1985;**26**(6):181-4.
32. Ganchev N, Serbezov V, Alexandrov E. Incidence of Q fever in two inadequately investigated occupational groups. *J Hyg Epidemiol Microbiol Immunol* 1977;**21**(4):405-1

1  
2  
3  
4  
5  
6  
7  
8  
9  
10  
11  
12  
13  
14  
15  
16  
17  
18  
19  
20  
21  
22  
23  
24  
25  
26  
27  
28  
29  
30  
31  
32  
33  
34  
35  
36  
37  
38  
39  
40  
41  
42  
43  
44  
45  
46  
47  
48  
49  
50  
51  
52  
53  
54  
55  
56  
57  
58  
59  
60

For peer review only

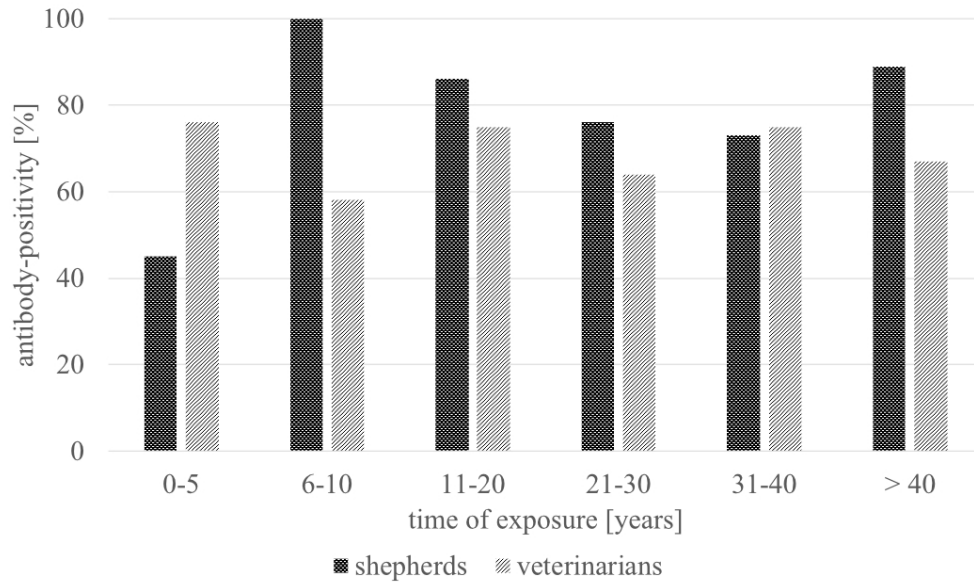

Figure 1: Antibody-positivity in relation to duration of exposure  
\*shepherds: 0-5 years: n=5, 6-10: n=5, 11-20: n=6, 21-30: n=16, 31-40: n=11, >40: n=16  
veterinarians: 0-5 years: n=13, 6-10: n=7, 11-20: n=9, 21-30: n=9, 31-40: n=9, >40: n=4

90x90mm (300 x 300 DPI)

**STROBE 2007 (v4) Statement—Checklist of items that should be included in reports of *cross-sectional studies***

| Section/Topic                | Item # | Recommendation                                                                                                                                                                       | Reported on page # |
|------------------------------|--------|--------------------------------------------------------------------------------------------------------------------------------------------------------------------------------------|--------------------|
| <b>Title and abstract</b>    | 1      | (a) Indicate the study's design with a commonly used term in the title or the abstract                                                                                               | 1                  |
|                              |        | (b) Provide in the abstract an informative and balanced summary of what was done and what was found                                                                                  | 2                  |
| <b>Introduction</b>          |        |                                                                                                                                                                                      |                    |
| Background/rationale         | 2      | Explain the scientific background and rationale for the investigation being reported                                                                                                 | 4                  |
| Objectives                   | 3      | State specific objectives, including any prespecified hypotheses                                                                                                                     | 4                  |
| <b>Methods</b>               |        |                                                                                                                                                                                      |                    |
| Study design                 | 4      | Present key elements of study design early in the paper                                                                                                                              | 5                  |
| Setting                      | 5      | Describe the setting, locations, and relevant dates, including periods of recruitment, exposure, follow-up, and data collection                                                      | 5                  |
| Participants                 | 6      | (a) Give the eligibility criteria, and the sources and methods of selection of participants                                                                                          | 5                  |
| Variables                    | 7      | Clearly define all outcomes, exposures, predictors, potential confounders, and effect modifiers. Give diagnostic criteria, if applicable                                             | 5                  |
| Data sources/<br>measurement | 8*     | For each variable of interest, give sources of data and details of methods of assessment (measurement). Describe comparability of assessment methods if there is more than one group | 5                  |
| Bias                         | 9      | Describe any efforts to address potential sources of bias                                                                                                                            | 7                  |
| Study size                   | 10     | Explain how the study size was arrived at                                                                                                                                            | 5                  |
| Quantitative variables       | 11     | Explain how quantitative variables were handled in the analyses. If applicable, describe which groupings were chosen and why                                                         | 5                  |
| Statistical methods          | 12     | (a) Describe all statistical methods, including those used to control for confounding                                                                                                | 5                  |
|                              |        | (b) Describe any methods used to examine subgroups and interactions                                                                                                                  | 5                  |
|                              |        | (c) Explain how missing data were addressed                                                                                                                                          | No missing data    |
|                              |        | (d) If applicable, describe analytical methods taking account of sampling strategy                                                                                                   |                    |
|                              |        | (e) Describe any sensitivity analyses                                                                                                                                                | 6                  |
| <b>Results</b>               |        |                                                                                                                                                                                      |                    |



|                          |     |                                                                                                                                                                                                              |                 |
|--------------------------|-----|--------------------------------------------------------------------------------------------------------------------------------------------------------------------------------------------------------------|-----------------|
| Participants             | 13* | (a) Report numbers of individuals at each stage of study—eg numbers potentially eligible, examined for eligibility, confirmed eligible, included in the study, completing follow-up, and analysed            | 6               |
|                          |     | (b) Give reasons for non-participation at each stage                                                                                                                                                         | 7               |
|                          |     | (c) Consider use of a flow diagram                                                                                                                                                                           |                 |
| Descriptive data         | 14* | (a) Give characteristics of study participants (eg demographic, clinical, social) and information on exposures and potential confounders                                                                     | 6               |
|                          |     | (b) Indicate number of participants with missing data for each variable of interest                                                                                                                          | No missing data |
| Outcome data             | 15* | Report numbers of outcome events or summary measures                                                                                                                                                         | 6               |
| Main results             | 16  | (a) Give unadjusted estimates and, if applicable, confounder-adjusted estimates and their precision (eg, 95% confidence interval). Make clear which confounders were adjusted for and why they were included |                 |
|                          |     | (b) Report category boundaries when continuous variables were categorized                                                                                                                                    |                 |
|                          |     | (c) If relevant, consider translating estimates of relative risk into absolute risk for a meaningful time period                                                                                             |                 |
| Other analyses           | 17  | Report other analyses done—eg analyses of subgroups and interactions, and sensitivity analyses                                                                                                               |                 |
| <b>Discussion</b>        |     |                                                                                                                                                                                                              |                 |
| Key results              | 18  | Summarise key results with reference to study objectives                                                                                                                                                     | 7               |
| Limitations              | 19  | Discuss limitations of the study, taking into account sources of potential bias or imprecision. Discuss both direction and magnitude of any potential bias                                                   | 7               |
| Interpretation           | 20  | Give a cautious overall interpretation of results considering objectives, limitations, multiplicity of analyses, results from similar studies, and other relevant evidence                                   | 8               |
| Generalisability         | 21  | Discuss the generalisability (external validity) of the study results                                                                                                                                        | 8               |
| <b>Other information</b> |     |                                                                                                                                                                                                              |                 |
| Funding                  | 22  | Give the source of funding and the role of the funders for the present study and, if applicable, for the original study on which the present article is based                                                | 9               |

\*Give information separately for cases and controls in case-control studies and, if applicable, for exposed and unexposed groups in cohort and cross-sectional studies.

**Note:** An Explanation and Elaboration article discusses each checklist item and gives methodological background and published examples of transparent reporting. The STROBE checklist is best used in conjunction with this article (freely available on the Web sites of PLoS Medicine at <http://www.plosmedicine.org/>, Annals of Internal Medicine at <http://www.annals.org/>, and Epidemiology at <http://www.epidem.com/>). Information on the STROBE Initiative is available at [www.strobe-statement.org](http://www.strobe-statement.org).
